# Supplementary material
Source: MDPI journal article supplement (https://www.mdpi.com/2073-4344/9/11/926)
Supplement: s1 [file s1]

## Supplemental Materials

### *In situ* EPR characterization of a cobalt oxide water oxidation catalyst at neutral pH

Yury Kutin,<sup>1,†</sup> Nicholas Cox,<sup>2\*</sup> Wolfgang Lubitz,<sup>1</sup> Alexander Schnegg,<sup>1\*</sup> Olaf Rüdiger<sup>1\*</sup>

<sup>1</sup>Max-Planck-Institut für Chemische Energiekonversion, Stiftstr. 34-36, 45470 Mülheim an der Ruhr, Germany;

<sup>2</sup>Research School of Chemistry, the Australian National University, ACT 2601 Canberra, Australia;

<sup>†</sup>Present address: Department of Chemistry and Chemical Biology, TU Dortmund University, D-44227 Dortmund, Germany.

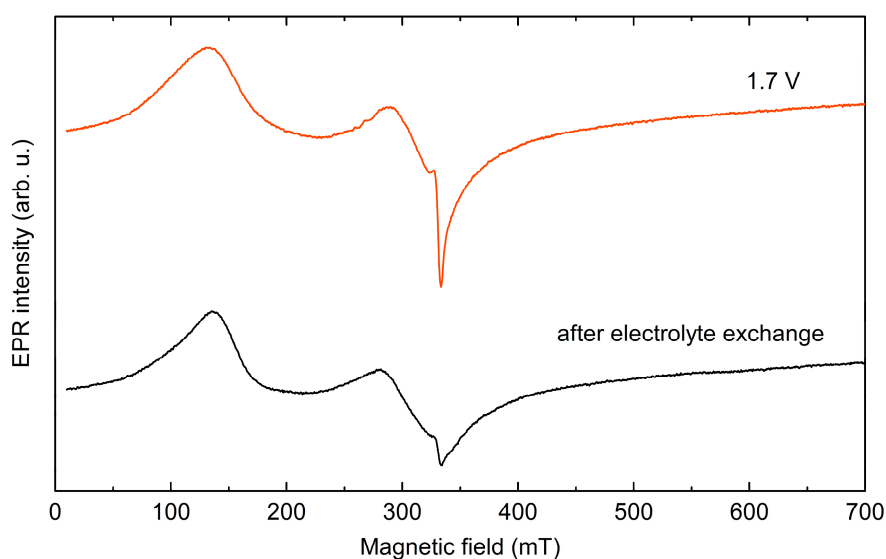

**Figure S1.** Bottom two traces of Figure 3 A: EPR spectra of a Co-Pi modified Au electrode electrolyzed at the highest applied potential of 1.7 V, recorded before (top) and after (bottom) the electrolyte solution exchange.  $P_{\text{MW}} = 63 \text{ mW}$ ,  $T = 5 \text{ K}$ .

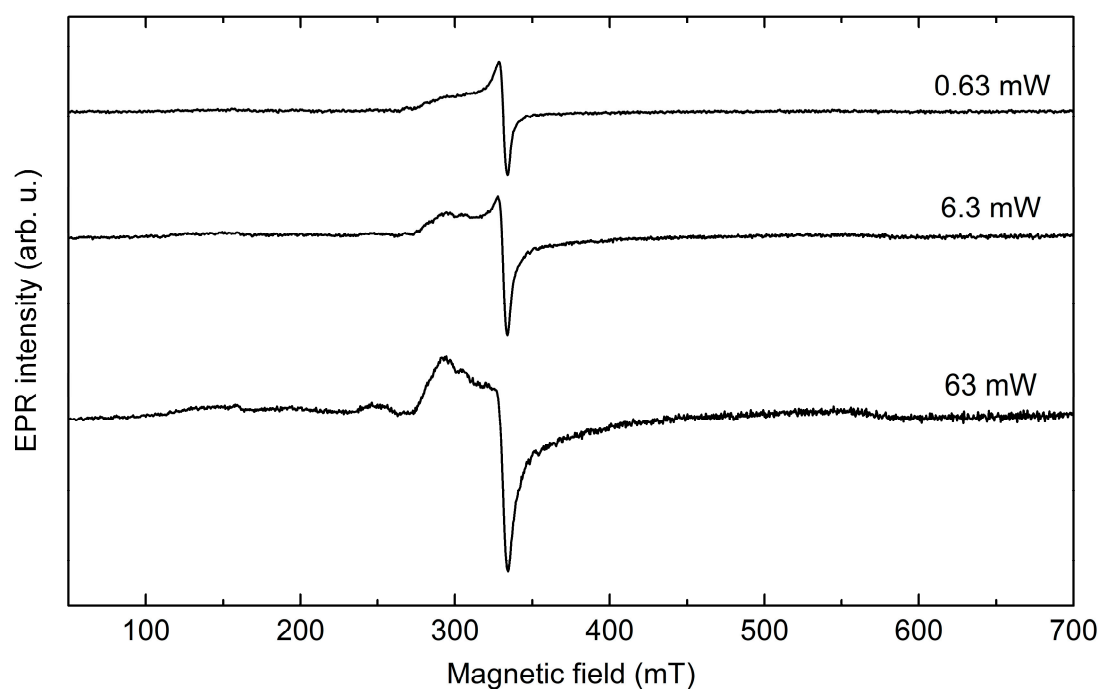

**Figure S2.** EPR spectra of the electrolyte solution used in the titration series measured at several MW power levels. The narrow  $g \approx 2.1$  line is found in the solution measured separately from the cell.

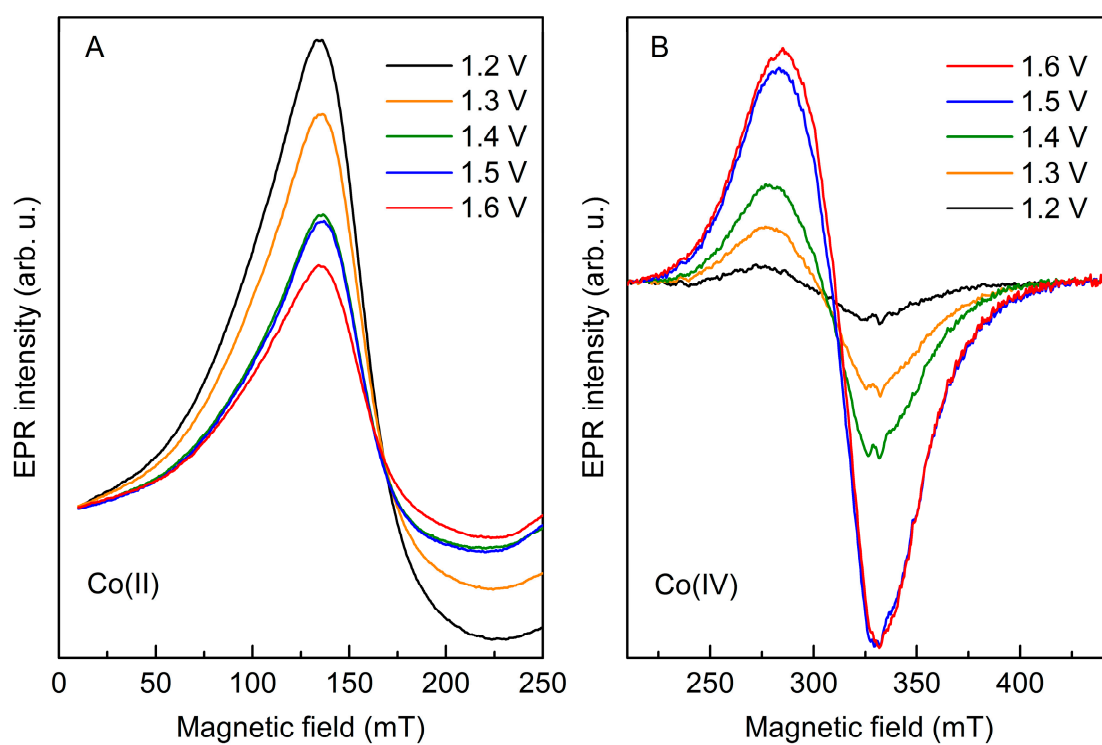

**Figure S3.** (A) The loss of the Co(II) species and (B) the increase in the Co(IV) EPR intensity as a function of applied potential above the water oxidation threshold.
